# Supplementary material for: ISU201 Enhances the Resolution of Airway Inflammation in a Mouse Model of an Acute Exacerbation of Asthma
Source: Hindawi journal article supplement (doi:10.1155/2015/405629), 2015-01-01

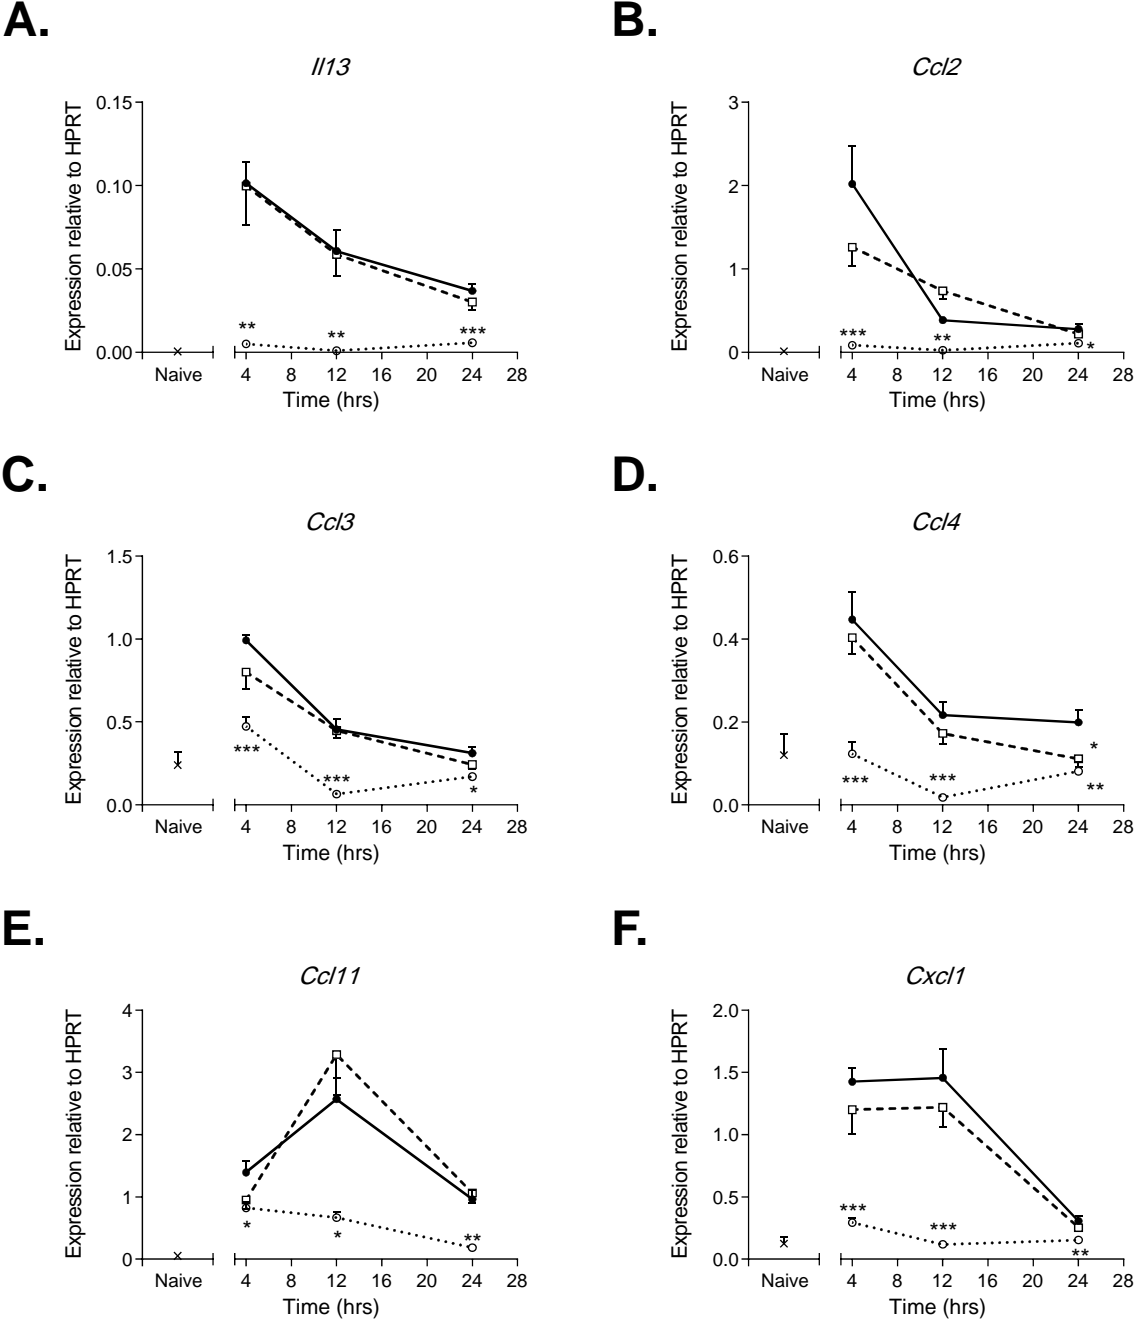

Supplement: f1 [file 405629.f1.pdf]
